# Supplementary material for: Development of the Vision Impairment in Low Luminance Questionnaire
Source: PubMed Central journal article supplement — Transl Vis Sci Technol. 2021 Jan 6;10(1):5. doi: 10.1167/tvst.10.1.5 (PMC7794270; doi:10.1167/tvst.10.1.5), 2021-01-06
Supplement: tvst-10-1-5_s001.pdf [file tvst-10-1-5_s001.pdf]

**Development of the Vision Impairment in Low Luminance (VILL) Questionnaire**

Susanne G. Pondorfer, M.Sc. <sup>1\*</sup>; Jan H. Terheyden, MD<sup>1\*</sup>; Helen Overhoff, M.Sc. <sup>2</sup>, Jana Stasch-Bouws, M.Sc.<sup>3</sup>, Frank G. Holz, MD<sup>1</sup>; Robert P. Finger, MD, PhD<sup>1</sup>

<sup>1</sup> Department of Ophthalmology, University Hospital Bonn, Bonn, Germany

<sup>2</sup> Forschungszentrum Jülich, Jülich, Germany

<sup>3</sup> AMD-Netz e.V., Münster, Germany

**SUPPLEMENT**

**Supplementary Table 1:** Demographic characteristics of participants who were administered the VILL-68

|                                              | Overall    | Early / intermediate AMD | Late AMD   | <i>P</i> |
|----------------------------------------------|------------|--------------------------|------------|----------|
| <i>n</i>                                     | 127        | 74                       | 53         |          |
| Age, Mean (SD)                               | 76.1 (7.2) | 76.0 (7.5)               | 76.3 (6.8) | 0.809*   |
| Gender, % ( <i>n</i> )                       |            |                          |            | 0.846**  |
| Female                                       | 69.3 (88)  | 70.3 (52)                | 67.9 (36)  |          |
| Male                                         | 30.7 (39)  | 29.7 (22)                | 32.1 (17)  |          |
| LogMAR visual acuity (better eye), Mean (SD) | 0.1 (0.2)  | 0.1 (0.1)                | 0.2 (0.2)  | 0.022*   |
| AMD stage, % ( <i>n</i> )                    |            |                          |            |          |
| Early / intermediate AMD                     | 58.3 (74)  |                          |            |          |
| Late AMD                                     | 41.7 (53)  |                          |            |          |

\* Unpaired t-test; \*\* Fisher's exact test
